## 20 **Abstract**

21           Spatial control of intracellular signaling relies on signaling proteins sensing their  
22 subcellular environment. In many cases, a large number of upstream signals are funneled to a  
23 master regulator of cellular behavior, but it remains unclear how individual proteins can rapidly  
24 integrate a complex array of signals within the appropriate spatial niche within the cell. As a  
25 model for how subcellular spatial information can control signaling activity, we have  
26 reconstituted the cell pole-specific control of the master regulator kinase/phosphatase CckA from  
27 the asymmetrically dividing bacterium *Caulobacter crescentus*. CckA is active as a kinase only  
28 when it accumulates within a microdomain at the new cell pole, where it co-localizes with the  
29 pseudokinase DivL. Both proteins contain multiple PAS domains, a multifunctional class of  
30 sensory domains present across the kingdoms of life. Here, we show that CckA uses its PAS  
31 domains to integrate information from DivL and on its own oligomerization state to control the  
32 balance of its kinase and phosphatase activities. We reconstituted the DivL-CckA complex on  
33 liposomes *in vitro* and found that DivL directly controls the CckA kinase-phosphatase switch,  
34 and that stimulation of either CckA catalytic activity depends on the second of its two PAS  
35 domains. We further show that CckA oligomerizes through a multi-domain interaction that is  
36 critical for stimulation of kinase activity by DivL, while DivL stimulation of CckA phosphatase  
37 activity is independent of CckA homo-oligomerization. Our results broadly demonstrate how  
38 signaling factors can leverage information from their subcellular niche to drive spatiotemporal  
39 control of cell signaling.

40

41

42

## 43 **Significance**

44           Cells must constantly make decisions involving many pieces of information at a  
45 molecular level. Kinases containing multiple PAS sensory domains detect multiple signals to  
46 determine their signaling outputs. In the asymmetrically dividing bacterium *Caulobacter*  
47 *croscensus*, the multi-sensor proteins DivL and CckA promote different cell types depending  
48 upon their subcellular location. We reconstituted the DivL-CckA interaction *in vitro* and showed  
49 that specific PAS domains of each protein function to switch CckA between kinase and  
50 phosphatase activities, which reflects their functions *in vivo*. Within the context of the cell, our  
51 reconstitution illustrates how multi-sensor proteins can use their subcellular location to regulate  
52 their signaling functions.

53

## 54 **Introduction**

55           Asymmetric cell division is a fundamental mechanism for generating cell type diversity  
56 across the kingdoms of life. Accomplishing an asymmetric division requires coordination  
57 between cell cycle-dependent gene expression and the dynamic subcellular localization and  
58 function of signaling proteins (1). A well-studied model system exhibiting asymmetric division  
59 is the bacterium *Caulobacter croscensus*, which generates two distinct daughter cells every cell  
60 division (Fig. 1A). A master regulator of cellular identity is the transcription factor CtrA, which  
61 when phosphorylated, directly controls gene expression of over 90 cell cycle regulated promoters  
62 while also inhibiting the initiation of DNA replication (2–4). CtrA~P is present and active as a  
63 transcription factor in the motile, replication-incompetent swarmer cell. Dephosphorylation and  
64 proteolysis of CtrA~P permits differentiation into a sessile stalked cell and the beginning of  
65 DNA replication (5). Upon progression into the predivisive stage, CtrA proteolysis ceases and

66 the transcription of *ctrA* is activated. Concurrently, a set of signaling proteins localize to the new  
67 cell pole, opposite the stalk, to promote CtrA phosphorylation and the biogenesis of the  
68 flagellum and pili. Spatial and temporal control of CtrA~P thus coordinates cell type identity  
69 with DNA replication and cell cycle progression.

70 The bifunctional histidine kinase/phosphatase CckA controls the phosphorylation state of  
71 CtrA (6–9). CckA uses sensory PAS domains to change its activity depending upon its  
72 subcellular location and the progression of the cell cycle (10, 11). We previously reconstituted  
73 CckA on liposomes *in vitro* to show that its kinase activity depends upon CckA surface density,  
74 and that this density-dependent response requires the first of its two PAS domains (11). In  
75 predivisional cells, CckA is a kinase when it accumulates at high density at the new cell pole,  
76 supplying the phosphate for CtrA~P through a phosphorelay protein, ChpT (Fig. 1A) (12).  
77 However, in the stalked cell, high levels of the second messenger c-di-GMP (cdG) promote  
78 CckA phosphatase activity, which depletes the CtrA pathway of phosphate (Fig. 1B) (11, 13,  
79 14).

80 Upstream of CckA, the pseudo-histidine kinase DivL is necessary for CckA localization  
81 to the new cell pole and essential for CckA kinase activity in predivisional cells (10, 15). CckA  
82 co-immunoprecipitates with DivL, suggesting that CckA regulation requires complex formation  
83 with DivL (10). DivL is also essential for effective inhibition of CckA kinase activity when the  
84 two proteins are away from the new cell pole. *In vivo*, interaction of DivL and the  
85 phosphorylated response protein DivK~P leads to inhibition of CckA kinase activity (16, 17). A  
86 tyrosine replaces histidine at the active site of the DivL pseudokinase with no apparent catalytic  
87 activity (18). It has been suggested that DivL switches between conformations that promote or  
88 inhibit CckA kinase activity when the two are in a complex (17).

89           In most histidine kinases, extracellular or intracellular signals interact with N-terminal  
90 PAS domains leading to a conformational change that in turn regulates the activity of the  
91 catalytic domains (19, 20). Kinases can also use this conserved structural link in the reverse  
92 direction. DivL (Fig. 1B) uses its kinase-like domain to bind to the phosphorylated response  
93 regulator DivK~P (17), predicted to drive a conformational change within DivL's PAS domains.  
94 This rearrangement in the PAS domains is then propagated as a regulatory signal to CckA's own  
95 PAS domains, regulating CckA catalytic activity (Fig. 1B) (17), and previous studies indicate  
96 that the PAS domains of the two proteins are sufficient for communication between the two  
97 proteins (10, 21). However, it has remained unclear whether DivL directly regulates CckA  
98 catalytic activity, and how a multi-PAS domain protein can pass distinct signals to a target  
99 kinase.

100           Here, we show that DivL directly regulates the kinase-phosphatase switch of CckA *in*  
101 *vitro* when the two proteins are reconstituted on proteoliposomes. DivL can inhibit CckA kinase  
102 activity in the absence of any ligands, instead stimulating CckA phosphatase activity. We also  
103 show that a point mutant in DivL can constitutively activate CckA kinase activity, and that  
104 stimulation of either kinase or phosphatase activity requires the PAS domains of DivL and PAS-  
105 B of CckA. Additionally, oligomerization of CckA is critical for DivL stimulation of kinase  
106 activity but not its stimulation of CckA phosphatase activity. While we must keep in mind that  
107 this reconstitution approach represents a simplified system that lacks additional factors present *in*  
108 *vivo*, our previous experiments using reconstituted CckA on liposomes have been supported by  
109 subsequent work demonstrating agreement that the CckA surface density that is critical for  
110 kinase activity in our *in vitro* experiments matches the surface density of CckA present at the  
111 new cell pole *in vivo* (22). In this study, we reconstitute an additional aspect of subcellular

112 regulation of CckA. We propose that DivL integrates information about subcellular localization  
113 and cell cycle progression to toggle CckA between its kinase and phosphatase modes in a PAS  
114 domain-dependent manner (Fig. 1B).

115

## 116 **Results**

### 117 *DivL directly inhibits CckA kinase activity*

118 We set out to test whether DivL can directly regulate CckA catalytic activity *in vitro*.  
119 Membrane tethering is essential for CckA polar localization and kinase activity *in vivo* (6),  
120 suggesting that that membrane attachment may be important for productive interaction between  
121 CckA and DivL (6). We purified CckA and DivL constructs containing N-terminal His-tags in  
122 place of their transmembrane helices, and we tethered the two proteins to Ni-NTA groups on a  
123 fluid lipid surface (Fig. 2A) (11). Unless otherwise stated, we present data using a DivL  
124 construct lacking its N-terminal domain A, which has distant homology to PAS domains (23,  
125 24), due to the increased protein stability of the shortened construct and its indistinguishable  
126 behavior from the full length construct in all of our assays. To probe DivL's regulation of CckA  
127 kinase activity, we incubated CckA and DivL at equimolar concentrations of 5  $\mu$ M either in  
128 solution or an equivalent amount of protein at 350 molecules of each protein per liposome. CckA  
129 kinase activity was measured by auto-phosphorylation in the presence of [ $\gamma$ -P32]-ATP followed  
130 by autoradiography. Strikingly, co-loading DivL with CckA on liposomes inhibited CckA  
131 kinase activity, whereas co-incubation of the two proteins at 5  $\mu$ M each in solution, with no  
132 liposomes, yielded no change to kinase activity (Fig. 2B), suggesting that membrane tethering is  
133 critical for interaction between the two proteins.

134 Previous studies indicated that the PAS domains of CckA and DivL (Fig. 1B) are  
135 important for both proteins' signaling functions (10, 11, 17). To test whether the DivL PAS  
136 domains are critical for its inhibition of CckA autophosphorylation, we purified a series of DivL  
137 PAS domain deletion mutants, progressively truncating PAS domains from the N-terminus (17).  
138 We then incubated these DivL PAS domain truncations with CckA on liposomes to measure  
139 their effects on CckA kinase activity (Fig. 2C). While the full-length DivL and a construct  
140 lacking PAS domain A inhibited CckA to the same extent, the DivL constructs  $\Delta$ PAS-AB and  
141  $\Delta$ PAS-ABCD did not impact CckA kinase activity, demonstrating that the two N-terminal PAS  
142 domains of DivL were necessary for a functional interaction on the membrane. This finding is  
143 consistent with the prior model suggesting that DivL and CckA communicate through contacts in  
144 their PAS domains (17).

145 To determine the potency of DivL as an inhibitor of kinase activity, we titrated DivL at  
146 different surface densities against a fixed density of CckA on liposomes. DivL robustly inhibited  
147 CckA kinase activity with an  $IC_{50}$  of 22 DivL molecules per liposome (95% confidence interval:  
148 15-31 DivL/liposome), 15-fold lower than the CckA surface density (Figure 2D). This sub-  
149 stoichiometric inhibition implies that DivL inhibition of kinase activity may be due to enhanced  
150 phosphatase activity by DivL or CckA towards CckA~P. These *in vitro* data indicate that in the  
151 absence of accessory factors, DivL can sub-stoichiometrically inhibit CckA kinase activity (Fig.  
152 2D). *In vivo*, DivL binds the accessory factor DivK~P to inhibit CckA kinase activity when  
153 these proteins are away from the new cell pole (16), while DivL is critical for stimulation of  
154 CckA kinase activity when the two proteins co-localize at the new cell pole (10, 16). Based on  
155 these findings, we propose that DivL binds another accessory factor at the new cell pole to  
156 facilitate its stimulation of CckA kinase activity.

157

158 ***DivL stimulates CckA auto-phosphatase activity***

159 Inhibition of kinase activity in many HKs frequently represents a concerted switch to a  
160 conformation that has increased phosphatase activity towards the cognate receiver domain (25,  
161 26). It was previously shown that binding of the second messenger (cdG) causes CckA to switch  
162 from kinase mode to phosphatase mode (11, 13, 27). This finding suggests that DivL's  
163 inhibition of CckA kinase activity may, similar to cdG, induce a switch from a kinase-active  
164 conformation to a phosphatase-active one. Alternatively, we considered the possibility that DivL  
165 may directly perform the phosphatase activity on CckA's receiver domain.

166 We therefore tested whether DivL promotes CckA dephosphorylation *in vitro*,  
167 monitoring the rate at which purified CckA~P lost phosphate when incubated with or without  
168 DivL on liposomes (Fig. 3A). The presence of DivL on liposomes with CckA stimulated the loss  
169 of CckA~P signal, indicating that one of the proteins was performing phosphatase activity (Fig.  
170 3B). DivL did not stimulate phosphate decay from the phosphatase-deficient mutant CckA  
171 V366P (28), indicating that CckA, and not DivL, is responsible for performing phosphatase  
172 activity (Fig. S1A, B). To test if the CckA PAS domains are necessary for this response to DivL  
173 (Fig. 1B), we repeated the phosphatase experiment for the CckA variants  $\Delta$ PAS-A,  $\Delta$ PAS-B, and  
174  $\Delta$ PAS-AB. CckA  $\Delta$ PAS-A rapidly lost phosphate upon co-loading with DivL on liposomes,  
175 indicating that CckA PAS-A is not necessary for interaction with DivL or phosphatase activity  
176 (Fig. 3C).

177 Strikingly, CckA constructs lacking PAS-B did not show a change in autophosphatase  
178 activity in the presence of DivL (Fig. 3D, Fig. S1C). Because their autophosphatase activity was  
179 reduced compared to WT CckA, we took advantage of the finding that ADP binding promotes



180 the phosphatase-competent conformation of histidine kinases (25, 27) to show that CckA  $\Delta$ PAS-  
181 B and  $\Delta$ PAS-AB mutants do retain phosphatase function (Fig. S2). Thus, CckA PAS-B is  
182 necessary for auto-phosphatase stimulation by DivL. It is formally possible that CckA constructs  
183 lacking PAS-B are conformationally restricted in a manner that prevents interaction between  
184 DivL and another part of CckA. Given that the N-terminus of CckA comprising its  
185 transmembrane region, PAS-A, and PAS-B together are sufficient for response to DivL *in vivo*  
186 though (10), and PAS-A is not necessary for response to DivL in this assay (Fig. 3E), we propose  
187 that PAS-B is the CckA domain that communicates with DivL.

188 We previously showed that PAS-B of CckA is necessary for binding to cdG, and that it is  
189 sufficient for binding when domains involved in dimerization and oligomerization are also  
190 present (11). Because our findings indicate that DivL, like cdG, also signals through CckA's  
191 PAS domains, we further tested whether cdG cooperatively inhibited CckA in the presence of  
192 DivL. While cdG inhibition has been shown to be cooperative with ADP binding (27), we  
193 observed additive rather than cooperative inhibition of CckA kinase activity by cdG and DivL  
194 inhibition of CckA kinase activity (Fig. S1D).

195

### 196 ***A DivL point mutant directly stimulates CckA kinase activity***

197 Prior studies indicated that DivL switches between activating or inhibiting CckA kinase  
198 activity *in vivo*, depending on the stage of the cell cycle (10, 16), and uses accessory factors such  
199 as the phosphorylated response regulator DivK~P to determine its activity towards CckA.  
200 Tsokos et al. found that a DivL point mutant, A601L, enhanced CckA kinase activity by fivefold  
201 *in vivo* during the stalked cell phase of the cell cycle even when the proteins were localized away  
202 from the new cell pole (16). This finding suggests that DivL A601L activates CckA kinase

203 activity independent of upstream signals. Moreover, structure-function analysis suggested that  
204 the A601L mutation changes the global conformation of DivL in a PAS domain-dependent  
205 manner (17).

206 To determine if DivL A601L directly stimulates CckA kinase activity through the CckA  
207 PAS domains. The CckA PAS domain mutants had different capacities for response to DivL  
208 A601L (Fig. 3E). While CckA  $\Delta$ PAS-B retained kinase activity when tethered to liposomes, its  
209 kinase activity did not respond to the presence of DivL A601L. Conversely, CckA variants  
210 lacking PAS-A did not demonstrate significant kinase activity on liposomes as we previously  
211 observed, and DivL A601L did not rescue their kinase activities. These data indicate that PAS-B  
212 is specifically required for a kinase response to DivL A601L, while PAS-A is critical for CckA  
213 kinase activity. Because PAS-A is critical for CckA surface density-dependent kinase activity,  
214 we tested compared the effects of DivL A601L stimulation of CckA kinase activity at different  
215 densities (Fig. 3F). Even at reduced surface density, DivL A601L greatly stimulated CckA  
216 kinase activity, albeit to a lower total extent than when the two proteins were incubated at high  
217 density. This finding is consistent with the finding that A601L promotes CckA kinase activity  
218 even when the proteins are diffusely localized *in vivo* (16). Altogether, these data indicate that  
219 offer proof-of-principle that DivL can stimulate CckA kinase activity in a PAS domain specific  
220 manner and suggest that additional upstream signals may push DivL into this kinase activity  
221 promoting state *in vivo*.

222

### 223 ***CckA oligomerizes through PAS-A and its receiver domain***

224 The requirement of high surface densities for CckA kinase activity on liposomes suggests  
225 that it may need to oligomerize to become active as a kinase (11). While the catalytic core of

226 CckA, containing the DHP and CA domains, forms a canonical *trans*-phosphorylating dimer  
227 (27), we hypothesized that its PAS and receiver domains may drive higher oligomerization.  
228 There are a handful of histidine kinases believed to function as tetramers, including the kinase  
229 RegB, which loses kinase activity upon tetramerization (29–31). We assayed CckA  
230 oligomerization in solution using analytical size exclusion chromatography (SEC) to predict the  
231 molecular mass of CckA complexes. Indeed, we found that WT CckA eluted as a single  
232 tetrameric peak when injected onto the column at approximately 100  $\mu$ M in solution (Fig. 4A,  
233 Table S1). Knowing that PAS domains frequently mediate oligomerization (19), and that PAS-A  
234 is critical for density-dependent kinase activity, we tested the PAS domain dependence of CckA  
235 oligomerization. Removal of CckA PAS-A showed a reduction in oligomerization, with a peak  
236 center at 3.1 CckA per complex, indicating that PAS-A contributes to higher oligomerization, but  
237 that another domain in the protein continues to drive oligomerization in the absence of PAS-A  
238 (Fig. 4B). Removal of PAS-B yielded a smaller effect on CckA oligomerization than PAS-A  
239 (Supplementary Table S1).

240       Because the DHP domain typically only provides a conserved dimerization interface, we  
241 tested whether the receiver domain of CckA might also contribute to tetramerization. CckA  
242  $\Delta$ RD indeed showed a partial reduction in oligomerization (Fig. 4B), as well as a reduction in  
243 kinase activity on liposomes (Fig. S3). Simultaneous deletion of CckA variants lacking both  
244 PAS-A and RD ( $\Delta$ PAS-A  $\Delta$ RD and  $\Delta$ PAS-A-B  $\Delta$ RD), resulted in CckA attaining only a dimeric  
245 state. Given that the catalytic core of CckA has been shown to form a canonical dimer (27), it  
246 seems apparent that the dimers should not have to be disassembled and reassembled into a  
247 fourfold-symmetric tetramer. Similarly, we hypothesize that the elution peak centered at  
248 approximately three CckA molecules/complex represents an exchange between states containing

249 two and four CckA molecules/complex and tetrameric states, rather than forming a distinct  
250 trimer. We propose that CckA's PAS-A and the RD mediate the assembly of conserved HK  
251 dimers into a dimer of dimers (Fig. 4C).

252

## 253 **Discussion**

254 Cells must constantly integrate information to coordinate cell cycle events. For processes  
255 that require spatial control, such as differentiation and asymmetric division, their signaling  
256 proteins must additionally be able to recognize and respond to upstream factors found at distinct  
257 subcellular locations. Multi-sensor histidine kinases constitute a large set of signaling proteins  
258 which have the potential to respond to multiple signals, enabling the processing of information  
259 within subcellular niches. In this study, we have shown that the pseudokinase DivL controls the  
260 kinase-phosphatase switch of CckA through the PAS domains of the two proteins. DivL  
261 stimulation of kinase activity further requires CckA homo-oligomerization, illustrating how  
262 subcellular accumulation of CckA at the cell pole can be used as input information for the  
263 regulation of cellular asymmetry (Fig. 5).

264 We found that DivL can directly stimulate both CckA kinase and phosphatase activities  
265 in a PAS-B dependent manner (Fig. 1B), consistent with our previous finding that PAS-B is  
266 critical for new pole localization *in vivo* (11). We also previously showed that cdG binds in  
267 PAS-B of CckA, stimulating phosphatase activity (11). While most PAS domains typically  
268 sense only one ligand (19, 32), our finding that CckA PAS-B responds to both cdG and DivL  
269 adds to a small set of PAS domains that interact with multiple structurally unrelated ligands (19,  
270 33, 34). A recent report identified a point mutant within the CckA PAS-B domain that led to  
271 increased expression of a subset of early predivisional, CtrA-dependent genes (35), suggesting

272 that this mutant may specifically affect CckA interaction with DivL, cdG, or another signal, and  
273 that this mutant's effect is restricted to the early predivisional cell when CckA first becomes  
274 active as a kinase.

275 Consistent with Childers et al. (17), our data suggest that different conformations of the  
276 DivL PAS domains can communicate with PAS-B of CckA to regulate catalytic function (Fig.  
277 1B). This manner of regulation differs from the more common paradigm of PAS-mediated  
278 signaling, in which a given signal simply promotes one conformation of the target kinase (19).  
279 Rather, DivL can actively promote both the kinase and phosphatase activities of CckA,  
280 presumably through different contacts between CckA PAS-B and some part of the DivL PAS  
281 domains. Our truncation analysis of the DivL PAS domains (Fig. 2C) and prior studies indicate  
282 that its PAS domains B-D are critical domains involved in CckA regulation, but future  
283 investigations will be necessary to determine which domain(s) of DivL directly communicate  
284 with CckA and whether DivL also parses multiple input signals to determine its subcellular  
285 regulation of CckA activity.

286 Our data indicate that oligomerization is important for CckA kinase but not phosphatase  
287 activity, as only kinase activity is surface density dependent (11). The CckA PAS-A domain, a  
288 key driver of oligomerization, is necessary for stimulation of kinase but not phosphatase activity  
289 by DivL (Fig. 3). In most HKs, a signal in the PAS domain torques the central alpha-helical  
290 spine of the protein to regulate downstream catalytic domains (20, 36). The proline-rich linker  
291 between PAS-A and PAS-B of CckA is inconsistent with this alpha-helix, but it may provide a  
292 semi-rigid connection still capable of torque. Alternatively, oligomerization via PAS-A and RD  
293 (Fig. 4) may regulate kinase activity on the conserved principle of stabilizing a rotation of the  
294 ATP binding domain relative to the active site histidine by changing CckA-CckA contacts

295 between higher and lower assembly states. Indeed, structural evidence shows that binding of  
296 ATP versus ADP in the CA domain is sufficient to switch an HK between kinase and  
297 phosphatase conformations, respectively (25). Broadly, this demonstrates that the molecular  
298 impetus for switching between catalytic functions may come from many different parts of the  
299 protein, and oligomerization could provide multiple contact points to regulate kinase activity  
300 (Fig. 1B).

301 Further, oligomerization offers a straightforward mechanism for linking kinase activity to  
302 accumulation of a protein within a subcellular niche. In *Caulobacter*, a specialized collection of  
303 signaling and structural proteins at the new cell pole coordinates the stimulation of CckA kinase  
304 activity with polar organelle biogenesis (Fig. 5). The polar matrix protein PopZ defines the  
305 boundaries of DivL and CckA polar accumulation, and consequently the surface density of  
306 CckA, at the new pole (22, 37–39). Thus, the boundaries of the PopZ microdomain give  
307 subcellular context to CckA's density-dependent kinase activity.

308 Additional layers of regulation may promote CckA kinase activity at the new cell pole.  
309 Tsokos et al. proposed that the new pole constitutes a 'protected zone' in which other factors  
310 cannot inhibit CckA kinase activity (16). Moreover, the DivL mutant A601L directly stimulates  
311 CckA kinase activity, and suggests that additional factors at the new cell pole, reviewed  
312 elsewhere (40), may be necessary to promote kinase activity of the DivL-CckA complex *in vivo*.  
313 Our study of the DivL-CckA interaction reveals that DivL can switch between directly  
314 stimulating CckA kinase and phosphatase activities, that CckA parses multiple signals through  
315 its PAS-B domain, and that CckA oligomerization is critical for its kinase activity. Thus, a  
316 multi-sensor domain architecture provides a means for integrating a complex array of input

317 signals within the different spatial and temporal contexts required for a single master regulator  
318 that determines divergent cell fates.

319

## 320 **Materials and Methods**

### 321 **Cloning, protein expression, and purification**

322 PAS domain cut-offs in CckA and DivL were assigned using the HHpred protein  
323 homology web server (23, 24) and described in detail previously (11). New plasmids for this  
324 study were created using Gibson assembly as designed through the J5 cloning system(45). Other  
325 plasmids were described previously (11, 17, 28, 46, 47). Plasmids were transformed into *E. coli*  
326 via heat shock. A complete list of plasmids and strains used in this study is available in  
327 Supplementary Table 2. CckA and DivL variants were expressed and purified as described  
328 previously (11, 17, 47), and are described at length in the Supplementary Methods.

329

### 330 **Gel filtration chromatography**

331 Protein purification beyond Ni-NTA affinity was performed via gel filtration  
332 chromatography using a GP-250 gradient programmable chromatographer. Concentrated  
333 samples were separated using a Superdex 200 10/300 GL column. Fractions of 0.3 mL were  
334 collected, analyzed, and pooled to optimize purity.

335 Studies of CckA oligomerization via analytical gel filtration chromatography were  
336 performed using a GE Healthcare Superdex 200 Increase 10/300 GL column and a Bio-Rad  
337 NGC chromatography system. Apparent molecular weights of CckA oligomeric complexes were  
338 assigned using a standard curve based on elution volumes of a Bio-Rad premixed gel filtration  
339 standard (cat #151-1901). Elution was performed at 0.35 mL/min. CckA samples of

340 approximately 150  $\mu$ L were loaded at approximately 100  $\mu$ M and eluted at 350  $\mu$ L/min. A  
341 complete list of SEC experiments is given in Supplementary Table S1.

342

### 343 **Production of Large Unilamellar Liposomes**

344 Liposomes were made as described previously (11), with some adjustments. A mixture  
345 of 900  $\mu$ L of 10 mg/mL 1,2-dioleoyl-*sn*-glycero-3-phospho-(1'-*rac*-glycerol) (sodium salt)  
346 (DOPG: product 840475), was mixed with 1 mL of 1 mg/mL 1,2-dioleoyl-*sn*-glycero-3-[(N-(5-  
347 amino-1-carboxypentyl)iminodiacetic acid)succinyl] (nickel salt) (DGS-NTA(Ni): product  
348 790404C). Both lipids contain two 18-carbon acyl chains with a *cis*-alkene between carbon  
349 atoms 9 and 10 in each chain to membrane fluidity at room temperature. The chloroform  
350 solutions were well mixed in a glass scintillation vial, and the solvent was evaporated under a  
351 gentle stream of nitrogen for 1 hour to leave a clear film with no clumps. The film was then  
352 rehydrated in 500  $\mu$ L to 20 mg/mL in liposome rehydration buffer (100 mM KCl, 20 mM  
353 HEPES-KOH pH 8.0). The buffer was vigorously resuspended with a pipette until all of the  
354 lipid was dissolved. The vial containing the lipid mixture was then subjected to 10 freeze/thaw  
355 cycles in liquid nitrogen and a 37°C water bath. The freeze-thaw mixture was then extruded for  
356 11 passes through 100 nm pores of a polycarbonate filter using the Avanti Mini-Extruder.  
357 Following extrusion, the liposomes were diluted in equal volume ultrapure water (to a final  
358 concentration of 10 mg/mL) and aliquots were stored under nitrogen in plastic tubes to extend  
359 shelf life. Production of large unilamellar vesicles has also been described previously (48–50).

360

### 361 **Radiolabeling phosphorylation assays**



362 Radiolabeled auto-phosphorylation assays were similar to previous protocols (11). CckA  
363 constructs (5  $\mu$ M) were incubated in low salt kinase buffer (50 mM KCl, 10 mM HEPES-KOH  
364 pH 8.0) with 5 mM MgCl<sub>2</sub> and 0.5 mM ATP in 25  $\mu$ L reaction volumes. Glycerol was removed  
365 from protein samples via overnight dialysis prior to reactions to match the solvent conditions  
366 within the liposome lumens. Owing to opposite ionic strength preferences for kinase activity as  
367 compared to WT CckA, kinase assays for CckA  $\Delta$ PAS-B and  $\Delta$ PAS-AB were conducted in high  
368 salt buffer (200 mM KCl and 50 mM HEPES-KOH pH 8.0). For Figure 4B, CckA DPAS-B  
369 conditions are normalized to the no-DivL comparison in each case. For all LUV-based assays,  
370 CckA and DivL were allowed to incubate for 10 minutes with varying amounts of LUVs prior to  
371 addition of ATP stocks. Kinase assays on liposomes were conducted at a surface density of 350  
372 molecules per liposome of CckA, with 350 molecules per liposome of DivL where appropriate,  
373 unless otherwise noted. Maximum density corresponds to 1100 molecules per liposome.

374 Radiolabeled ATP was supplemented at of 2  $\mu$ Ci [ $\gamma$ -<sup>32</sup>P] ATP per reaction. Reactions  
375 were quenched after 3 minutes in 2x Laemmli sample buffer, and the quenched reaction mixtures  
376 were loaded onto 4-15% gradient polyacrylamide gels and subjected to electrophoresis.  
377 Alternatively, at this step for titration curve experiments, we used a nitrocellulose dot blot assay  
378 to separate phosphorylated protein from the reaction mixture, described previously (11). The  
379 extent of auto-phosphorylation was measured by exposing a phosphor screen to the gels for at  
380 least 3 hours, and the screen was subsequently imaged on a Typhoon storage phosphorimager  
381 (Molecular Dynamics). Band intensities were quantified using ImageJ.

382 For phosphatase assays, CckA was allowed to auto-phosphorylate in solution, and  
383 CckA~P was subsequently purified away from ATP. Depletion of ATP was accomplished by  
384 first rapidly passing the crude reaction mix through a desalting column to remove most of the

385 nucleotides. Hexokinase (12.5 units) and glucose (10 mM) were then added to convert any  
386 remaining ATP to ADP over 10 minutes. CckA~P was then deposited on liposomes that did or  
387 did not contain equimolar DivL to test whether DivL impacts CckA dephosphorylation. For  
388 phosphatase assays supplemented with ADP, the column purification step was skipped,  
389 permitting complete conversion of ATP to ADP by hexokinase.

390

## 391 **Acknowledgements**

392 We thank Seth Childers, Keith Moffat, Kim Kowallis, Sam Duvall, Michael Collins, and Keren  
393 Lasker for helpful discussion and critical review of the manuscript, and to Saumya Saurabh for  
394 helpful improvements in the liposome preparation protocol. Research reported in this  
395 publication was supported by the National Institute of General Medical Sciences of the National  
396 Institute of Health under award numbers: T32 GM007276, supporting T.H.M., as well as NIH  
397 award numbers R01 GM032506 and R35-GM118071 to L.S. The content is solely the  
398 responsibility of the authors and does not necessarily represent the official view of the National  
399 Institute of Health. L.S. is a Chan Zuckerberg Biohub Investigator.

400

## 401 **References**

- 402 1. Shapiro L, McAdams HH, Losick R (2009) Why and how bacteria localize proteins.  
403 *Science* 326(5957):1225–8.
- 404 2. Quon KC, Marczyński GT, Shapiro L (1996) Cell cycle control by an essential bacterial  
405 two-component signal transduction protein. *Cell* 84(1):83–93.
- 406 3. Laub MT, Chen SL, Shapiro L, McAdams HH (2002) Genes directly controlled by CtrA,  
407 a master regulator of the *Caulobacter* cell cycle. *Proc Natl Acad Sci U S A* 99(7):4632–7.
- 408 4. Quon KC, Yang B, Domian IJ, Shapiro L, Marczyński GT (1998) Negative control of  
409 bacterial DNA replication by a cell cycle regulatory protein that binds at the chromosome  
410 origin. *Proc Natl Acad Sci U S A* 95:13600–13605.
- 411 5. Domian IJ, Quon KC, Shapiro L (1997) Cell type-specific phosphorylation and  
412 proteolysis of a transcriptional regulator controls the G1-to-S transition in a bacterial cell

- 413 cycle. *Cell* 90(3):415–24.
- 414 6. Jacobs C, Domian IJ, Maddock JR, Shapiro L (1999) Cell cycle-dependent polar  
415 localization of an essential bacterial histidine kinase that controls DNA replication and  
416 cell division. *Cell* 97(1):111–20.
- 417 7. Jacobs C, Ausmees N, Cordwell SJ, Shapiro L, Laub MT (2003) Functions of the CckA  
418 histidine kinase in *Caulobacter* cell cycle control. *Mol Microbiol* 47(5):1279–1290.
- 419 8. Heinrich K, Sobetzko P, Jonas K (2016) A Kinase-Phosphatase Switch Transduces  
420 Environmental Information into a Bacterial Cell Cycle Circuit. *PLOS Genet*  
421 12(12):e1006522.
- 422 9. Vo CD, et al. (2017) Repurposing Hsp90 inhibitors as antibiotics targeting histidine  
423 kinases. *Bioorg Med Chem Lett* 27:5235–5244.
- 424 10. Iniesta AA, Hillson NJ, Shapiro L (2010) Cell pole-specific activation of a critical  
425 bacterial cell cycle kinase. *Proc Natl Acad Sci* 107(15):7012–7017.
- 426 11. Mann TH, Childers WS, Blair JA, Eckart MR, Shapiro L (2016) A cell cycle kinase with  
427 tandem sensory PAS domains integrates cell fate cues. *Nat Commun* 7:1–12.
- 428 12. Biondi EG, et al. (2006) Regulation of the bacterial cell cycle by an integrated genetic  
429 circuit. *Nature* 444(7121):899–904.
- 430 13. Lori C, et al. (2015) Cyclic di-GMP acts as a cell cycle oscillator to drive chromosome  
431 replication. *Nature* 523:236–239.
- 432 14. Christen M, et al. (2010) Asymmetrical distribution of the second messenger c-di-GMP  
433 upon bacterial cell division. *Science* 328(5983):1295–7.
- 434 15. Wu J, Ohta N, Zhao J-L, Newton A (1999) A novel bacterial tyrosine kinase essential for  
435 cell division and differentiation. *Proc Natl Acad Sci* 96(23):13068–13073.
- 436 16. Tsokos CG, Perchuk BS, Laub MT (2011) A dynamic complex of signaling proteins uses  
437 polar localization to regulate cell-fate asymmetry in *Caulobacter crescentus*. *Dev Cell*  
438 20(3):329–41.
- 439 17. Childers WS, et al. (2014) Cell fate regulation governed by a repurposed bacterial  
440 histidine kinase. *PLoS Biol* 12(10):e1001979.
- 441 18. Reisinger SJ, Huntwork S, Viollier PH, Ryan KR (2007) DivL performs critical cell cycle  
442 functions in *Caulobacter crescentus* independent of kinase activity. *J Bacteriol*  
443 189(22):8308–20.
- 444 19. Möglich A, Ayers RA, Moffat K (2009) Structure and signaling mechanism of Per-  
445 ARNT-Sim domains. *Structure* 17(10):1282–94.
- 446 20. Diensthuber RP, Bommer M, Gleichmann T, Möglich A (2013) Full-length structure of a  
447 sensor histidine kinase pinpoints coaxial coiled coils as signal transducers and modulators.  
448 *Structure* 21(7):1127–36.
- 449 21. Westbye AB, et al. (2018) The protease ClpXP and the PAS-domain protein DivL  
450 regulate CtrA and gene transfer agent production in *Rhodobacter capsulatus*. *Appl*  
451 *Environ Microbiol* (April):AEM.00275-18.
- 452 22. Lasker K, et al. (2017) Phospho-signal flow from a pole-localized microdomain spatially  
453 patterns transcription factor activity. *bioRxiv*.
- 454 23. Söding J, Biegert A, Lupas AN (2005) The HHpred interactive server for protein  
455 homology detection and structure prediction. *Nucleic Acids Res* 33(SUPPL. 2):244–248.
- 456 24. Zimmermann L, et al. (2017) A Completely Reimplemented MPI Bioinformatics Toolkit  
457 with a New HHpred Server at its Core. *J Mol Biol* (Table 1):1–7.
- 458 25. Casino P, Miguel-Romero L, Marina A (2014) Visualizing autophosphorylation in

- 459 histidine kinases. *Nat Commun* 5:3258.
- 460 26. Huynh TN, Stewart V (2011) Negative control in two-component signal transduction by  
461 transmitter phosphatase activity. *Mol Microbiol* 82(2):275–286.
- 462 27. Dubey BN, et al. (2016) Cyclic di-GMP mediates a histidine kinase / phosphatase switch  
463 by noncovalent domain cross-linking. *Sci Adv* 2(September):1–10.
- 464 28. Chen YE, Tsokos CG, Biondi EG, Perchuk BS, Laub MT (2009) Dynamics of two  
465 Phosphorelays controlling cell cycle progression in *Caulobacter crescentus*. *J Bacteriol*  
466 191(24):7417–29.
- 467 29. Little R, Martinez-Argudo I, Perry S, Dixon R (2007) Role of the H domain of the  
468 histidine kinase-like protein NifL in signal transmission. *J Biol Chem* 282(18):13429–  
469 13437.
- 470 30. Eswaramoorthy P, Guo T, Fujita M (2009) In vivo domain-based functional analysis of  
471 the major sporulation sensor kinase, KinA, in *Bacillus subtilis*. *J Bacteriol* 191(17):5358–  
472 5368.
- 473 31. Willett JW, Crosson S (2017) Atypical modes of bacterial histidine kinase signaling. *Mol*  
474 *Microbiol* 103(2):197–202.
- 475 32. Henry JT, Crosson S (2011) Ligand-Binding PAS Domains in a Genomic, Cellular, and  
476 Structural Context. *Annu Rev Microbiol* 65(1):261–286.
- 477 33. Scheuermann TH, et al. (2009) Artificial ligand binding within the HIF2alpha PAS-B  
478 domain of the HIF2 transcription factor. *Proc Natl Acad Sci U S A* 106(2):450–5.
- 479 34. Hoffman EC, et al. (1991) Cloning of a factor required for activity of the Ah (dioxin)  
480 receptor. *Science* 252(5008):954–958.
- 481 35. Narayanan S, Kumar L, Radhakrishnan SK (2018) Sensory domain of the cell cycle  
482 kinase CckA in *Caulobacter crescentus* regulates the differential DNA binding activity of  
483 the master regulator CtrA. *bioRxiv*.
- 484 36. Möglich A, Ayers R a., Moffat K (2010) Addition at the Molecular Level: Signal  
485 Integration in Designed Per-ARNT-Sim Receptor Proteins. *J Mol Biol* 400(3):477–486.
- 486 37. Ebersbach G, Briegel A, Jensen GJ, Jacobs-Wagner C (2008) A self-associating protein  
487 critical for chromosome attachment, division, and polar organization in *caulobacter*. *Cell*  
488 134(6):956–68.
- 489 38. Bowman GR, et al. (2008) A Polymeric Protein Anchors the Chromosomal Origin/ParB  
490 Complex at a Bacterial Cell Pole. *Cell* 134(6):945–955.
- 491 39. Holmes JA, et al. (2016) *Caulobacter* PopZ forms an intrinsically disordered hub in  
492 organizing bacterial cell poles. *Proc Natl Acad Sci* 113(44):12490–12495.
- 493 40. Lasker K, Mann TH, Shapiro L (2016) An intracellular compass spatially coordinates cell  
494 cycle modules in *Caulobacter crescentus*. *Curr Opin Microbiol* 33:131–139.
- 495 41. Chen YE, Tropini C, Jonas K, Tsokos CG, Huang KC (2010) Spatial gradient of protein  
496 phosphorylation underlies replicative asymmetry in a bacterium. *Proc Natl Acad Sci U S*  
497 *A*.
- 498 42. Viollier PH, Sternheim N, Shapiro L (2002) Identification of a localization factor for the  
499 polar positioning of bacterial structural and regulatory proteins. *Proc Natl Acad Sci U S A*  
500 99(21):13831–6.
- 501 43. Matroule J-Y, Lam H, Burnette DT, Jacobs-Wagner C (2004) Cytokinesis monitoring  
502 during development; rapid pole-to-pole shuttling of a signaling protein by localized kinase  
503 and phosphatase in *Caulobacter*. *Cell* 118(5):579–90.
- 504 44. Sanselicio S, Bergé M, Théraulaz L, Radhakrishnan SK, Viollier PH (2015) Topological

- 505 control of the *Caulobacter* cell cycle circuitry by a polarized single-domain PAS protein.  
506 *Nat Commun* 6(May):7005.
- 507 45. Hillson NJ, Rosengarten RD, Keasling JD (2012) j5 DNA Assembly Design Automation.  
508 *ACS Synth Biol* 1116:14–21.
- 509 46. Rocco CJ, Dennison KL, Klenchin V a., Rayment I, Escalante-Semerena JC (2008)  
510 Construction and use of new cloning vectors for the rapid isolation of recombinant  
511 proteins from *Escherichia coli*. *Plasmid* 59(3):231–237.
- 512 47. Blair JA, et al. (2013) Branched signal wiring of an essential bacterial cell-cycle  
513 phosphotransfer protein. *Structure* 21(9):1590–601.
- 514 48. Hope MJ, Bally MB, Webb G, Cullis PR (1985) Production of large unilamellar vesicles  
515 by a rapid extrusion procedure: characterization of size distribution, trapped volume and  
516 ability to maintain a membrane potential. *Biochim Biophys Acta* 812:55–65.
- 517 49. Mayer LD, Hope MJ, Cullis PR (1986) Vesicles of variable sizes produced by a rapid  
518 extrusion procedure. *Biochim Biophys Acta* 858:161–168.
- 519 50. Kim J, Blackshear PJ, Johnson JD, McLaughlin S (1994) Phosphorylation reverses the  
520 membrane association of peptides that correspond to the basic domains of MARCKS and  
521 neuromodulin. *Biophys J* 67(1):227–37.
- 522
- 523
- 524
- 525

## 526 **Figure Legends**

### 527 **Figure 1. DivL regulates CckA kinase and phosphatase activities as a function of the cell**

528 **cycle.** A. DivL (green) and CckA (orange) subcellular localizations are dynamic over the  
529 *Caulobacter* cell cycle. In the swarmer and stalked cells, both proteins are diffusely deployed  
530 around the membrane (dashed lines). In the predivisional cell, DivL accumulates at the new cell  
531 pole (green circle), where it is essential for both CckA new pole-localization and CckA kinase  
532 activity. CckA (orange circles) accumulates at both the old and new cell poles, and both proteins  
533 maintain a partial diffuse population outside of the polar niches. CckA kinase and phosphatase  
534 activities control the cell cycle dependent phosphorylation state of the master regulator, CtrA.  
535 Phosphorylated CtrA~P (grayscale) inhibits the initiation of DNA replication and activates  
536 transcription of over 90 promoters. Phosphate is shuttled between CckA and CtrA via the  
537 transfer protein ChpT (lavender). B. CckA and DivL both integrate signals to determine CckA  
538

539 kinase activity. Light blue arrows represent transmission of a CckA kinase-stimulating signal,  
540 whereas dark blue arrows represent a phosphatase-stimulating signal. Light and dark bars  
541 represent the binding sites for those signals, respectively. DivK~P acts as an accessory factor to  
542 DivL, binding in the DHp domain and reconfiguring the DivL PAS domains signaling to  
543 promote CckA phosphatase activity. Stimulation of CckA kinase and phosphatase activities by  
544 DivL are both transmitted in a CckA PAS-B dependent manner, likely through different binding  
545 sites. In addition to receiving a signal from DivL, CckA oligomerization and c-di-GMP promote  
546 CckA kinase and phosphatase activities, respectively. CckA catalytic output is determined upon  
547 integration of all available signals. TM represents the transmembrane tethers of the two proteins,  
548 replaced by His-tags in our *in vitro* experiments.

549

550 **Figure 2. DivL directly regulates CckA kinase activity in a DivL PAS domain-dependent**

551 **manner.** A. Purified CckA and DivL can be tethered to liposomes to facilitate their interaction.  
552 The liposomes are doped with Ni-NTA-containing lipids, and the proteins are attached via N-  
553 terminal His-tags, mimicking their membrane tethers *in vivo*. B. CckA kinase activity was  
554 measured by allowing CckA to autophosphorylate for 3 minutes in the presence of [ $\gamma$ -P32]-ATP.  
555 The effect of DivL on CckA kinase activity was measured either free in solution or on  
556 liposomes. C. CckA kinase activity was measured in the presence of different DivL PAS domain  
557 truncations. For each DivL variant, removal of a domain is represented by the dashed, empty  
558 boxes, while presence of the domain is represented by green shading. D. CckA  
559 autophosphorylation was measured in the presence of varying surface densities of DivL. Kinase  
560 activity is normalized to the no-DivL condition in each panel. All protein densities except for



561 the DivL titration in panel D were 350 molecules per liposome. Error bars represent the standard  
562 deviation of at least 3 experiments for all panels.

563

564 **Figure 3. DivL can stimulate CckA as an auto-phosphatase or as an auto-kinase, in a CckA**

565 **PAS-B dependent manner.** A. A schematic illustrates how to test whether DivL affects CckA

566 phosphatase activity *in vitro*. More details are available in the Methods section. B. The loss of

567 CckA~P signal following ATP depletion was monitored by quenching reaction aliquots at 0.5, 1,

568 2, 4, and 10 minutes following mixing of CckA and DivL. (C, D) The experiment was repeated

569 for the CckA variants CckA  $\Delta$ PAS-A and  $\Delta$ PAS-B, respectively. The experiment was modified

570 for CckA  $\Delta$ PAS-B by omitting the desalting column step, keeping 500  $\mu$ M ADP in solution

571 following hexokinase treatment, and monitoring CckA~P for approximately 100 minutes. PAS

572 domain deletions are represented as empty, dashed boxes. E. The CckA PAS domain dependence

573 for autokinase activation by DivL A601L was tested. The kinase activities of CckA variants

574  $\Delta$ PAS-A,  $\Delta$ PAS-B, and  $\Delta$ PAS-A-B (orange domain schematics) were tested with DivL A601L

575 (green) or without it (black) at 350 molecules per liposome for each protein. Kinase activity is

576 normalized to the CckA-only condition for each variant. For constructs lacking PAS-A, kinase

577 activity at this density was very low and is represented by an \*. F. The density dependence of

578 CckA response to DivL A601L was tested. In each experiment, CckA was present at 5  $\mu$ M total

579 in solution, with liposomes added to bring CckA to either 350 (black) or 100 (gray) molecules

580 per liposome. DivL A601L was present on liposomes in equimolar quantities to each CckA

581 condition where applicable. For panels B-D, CckA~P decay traces are representative of at least

582 two independent experiments, and for panels E and F, error bars represent the range of at least

583 two experiments.

584

585 **Figure 4. CckA oligomerizes through a multi-domain interaction.** A. The oligomerization  
586 state of CckA in solution was measured by analytical size exclusion chromatography. The  
587 elution trace from the size exclusion column is shown, with dashed vertical lines indicating the  
588 predicted elution volumes for a tetramer or dimer. Predicted molecular mass of the CckA  
589 complex was interpolated using a standard curve of known protein masses. B. The size exclusion  
590 experiment was repeated for the CckA variants  $\Delta$ PAS-A,  $\Delta$ PAS-A-B,  $\Delta$ RD,  $\Delta$ PAS-A- $\Delta$ RD, and  
591  $\Delta$ PAS-A-B- $\Delta$ RD. The projected CckA per complex is shown to the right of each variant. A  
592 complete list of SEC experiments is given in Supplementary Table S1. In each experiment,  
593 CckA was loaded onto the column at a concentration of roughly 100  $\mu$ M. A complete list of  
594 SEC experiments is given in Supplementary Table S1. C. (Left) A two-step model for CckA  
595 oligomerization illustrates the domains involved in each oligomerization step, highlighted in  
596 orange. The DHP domain promotes a conserved dimerization step. PAS-A and the RD are both  
597 critical for assembly into a dimer of dimers. This representation does not reflect the relative  
598 positions of the domains in 3D. (Right) Two possible models for how RD contributes to CckA  
599 oligomerization are shown as 2D projections looking down the central DHP axis from the N-  
600 terminus, one by RD-RD dimerization, common among response regulators, or by RD-DHP  
601 contacts that bridge two dimers.

602

603 **Figure 5. Multiple signals converge on CckA to regulate its kinase-phosphatase switch**  
604 **depending upon its subcellular niche.** A model of spatially controlled kinase/phosphatase  
605 signaling. CckA (orange) accumulates at the new cell pole, favoring oligomerization and  
606 formation of a kinase-active complex with DivL (green), possibly with the help of an additional



607 kinase-stimulating factor (blue) specifically localized at that pole. Kinase activity leads to  
608 phosphorylation of ChpT (gray) and eventually CtrA. Outside of the new pole the DivL/DivK~P  
609 (red) complex can promote CckA phosphatase activity regardless of CckA's oligomeric state,  
610 siphoning phosphate out of the CtrA pathway.

611

612

613

614

615

616

617

618

619

620

621

622

623

624

625

626 **Figures**

627 Figure 1

628

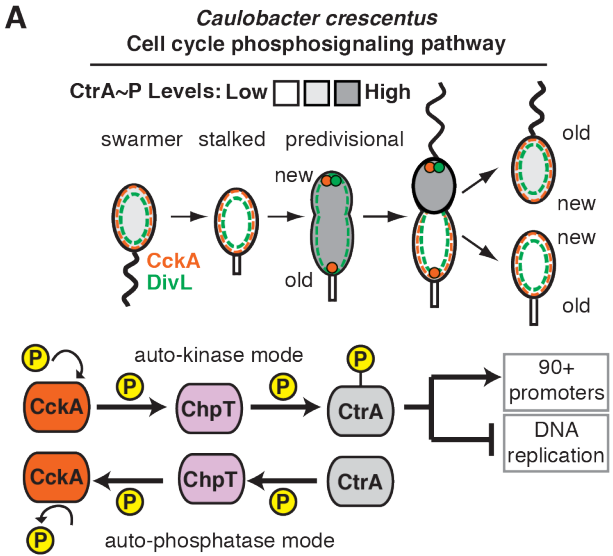

**B** Proposed allosteric regulation of CckA by DivL and spatially controlled accessory factors

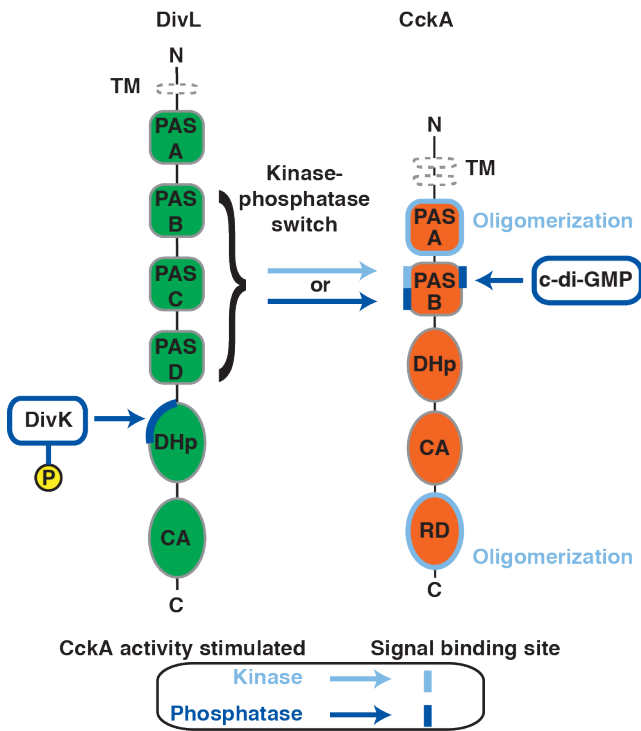

629

630

631

632

633

634 Figure 2

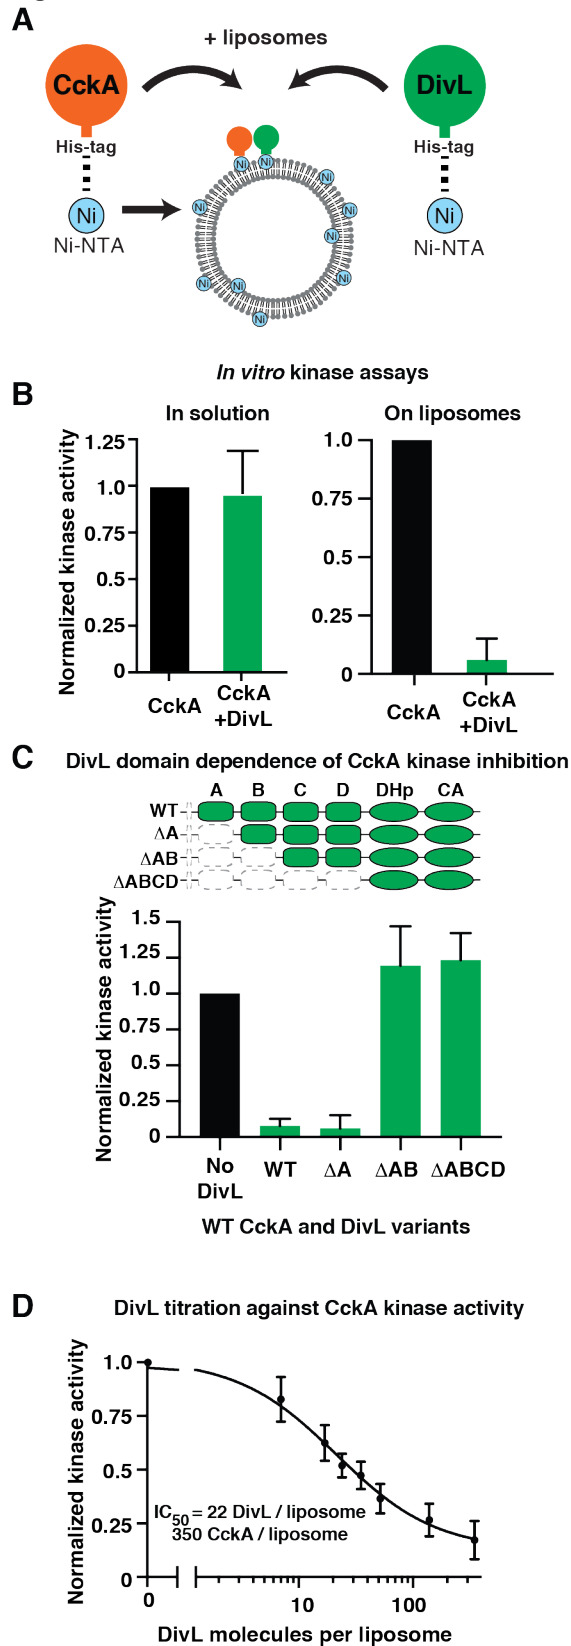

635

636 Figure 3

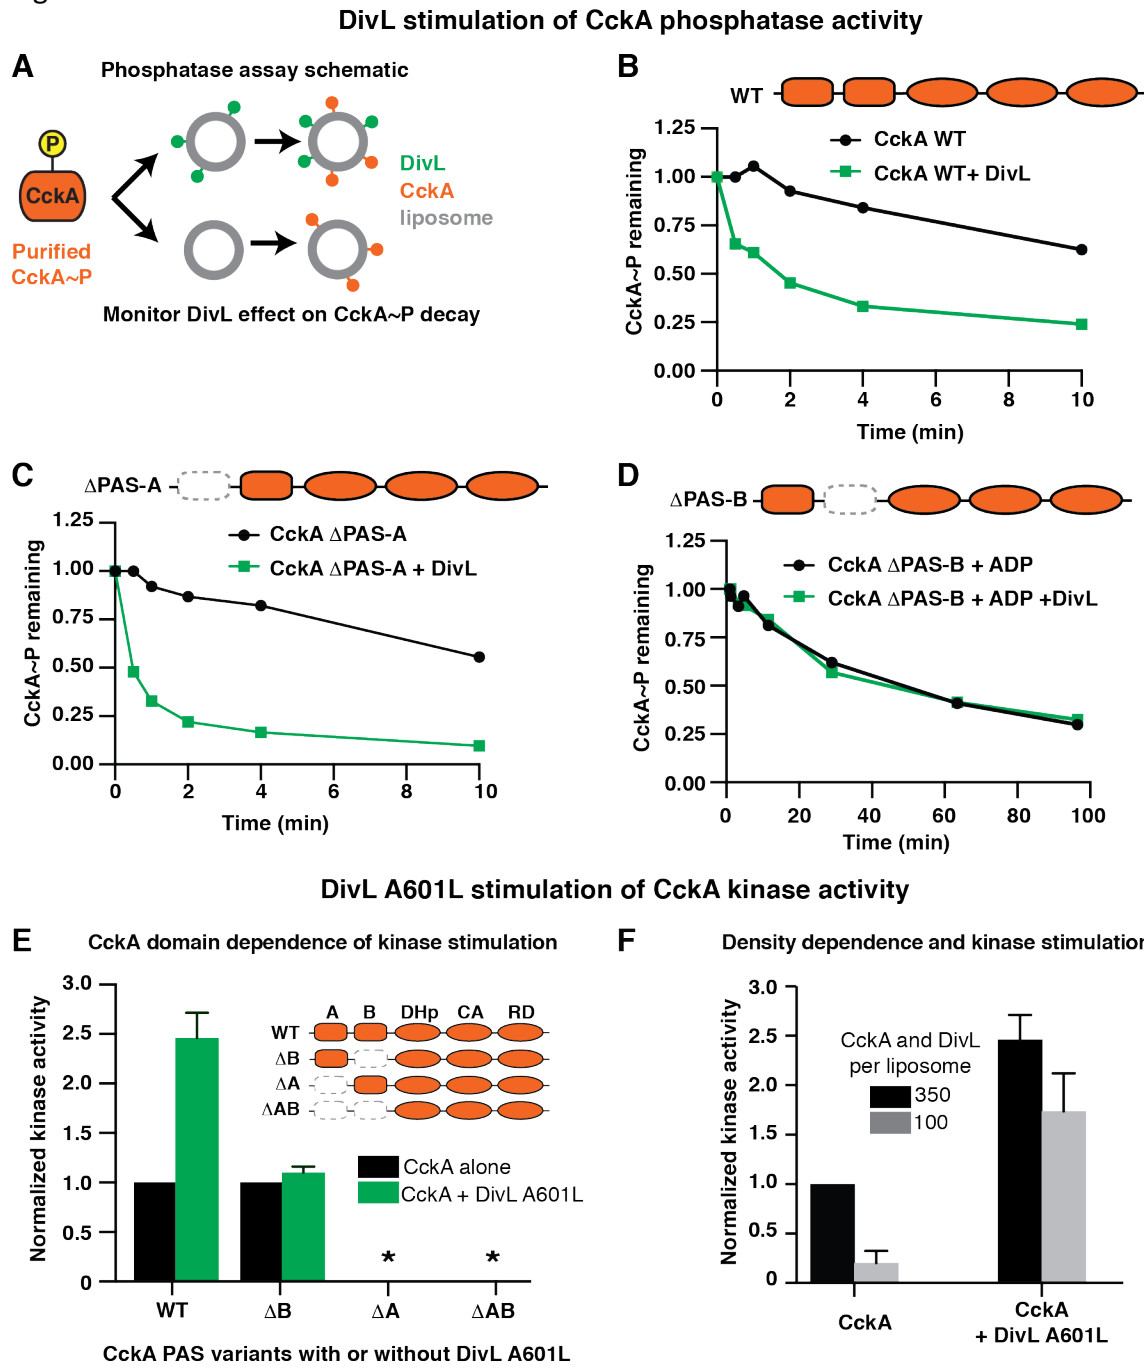

637

638

639

640

641

642

643

644

645

646 Figure 4

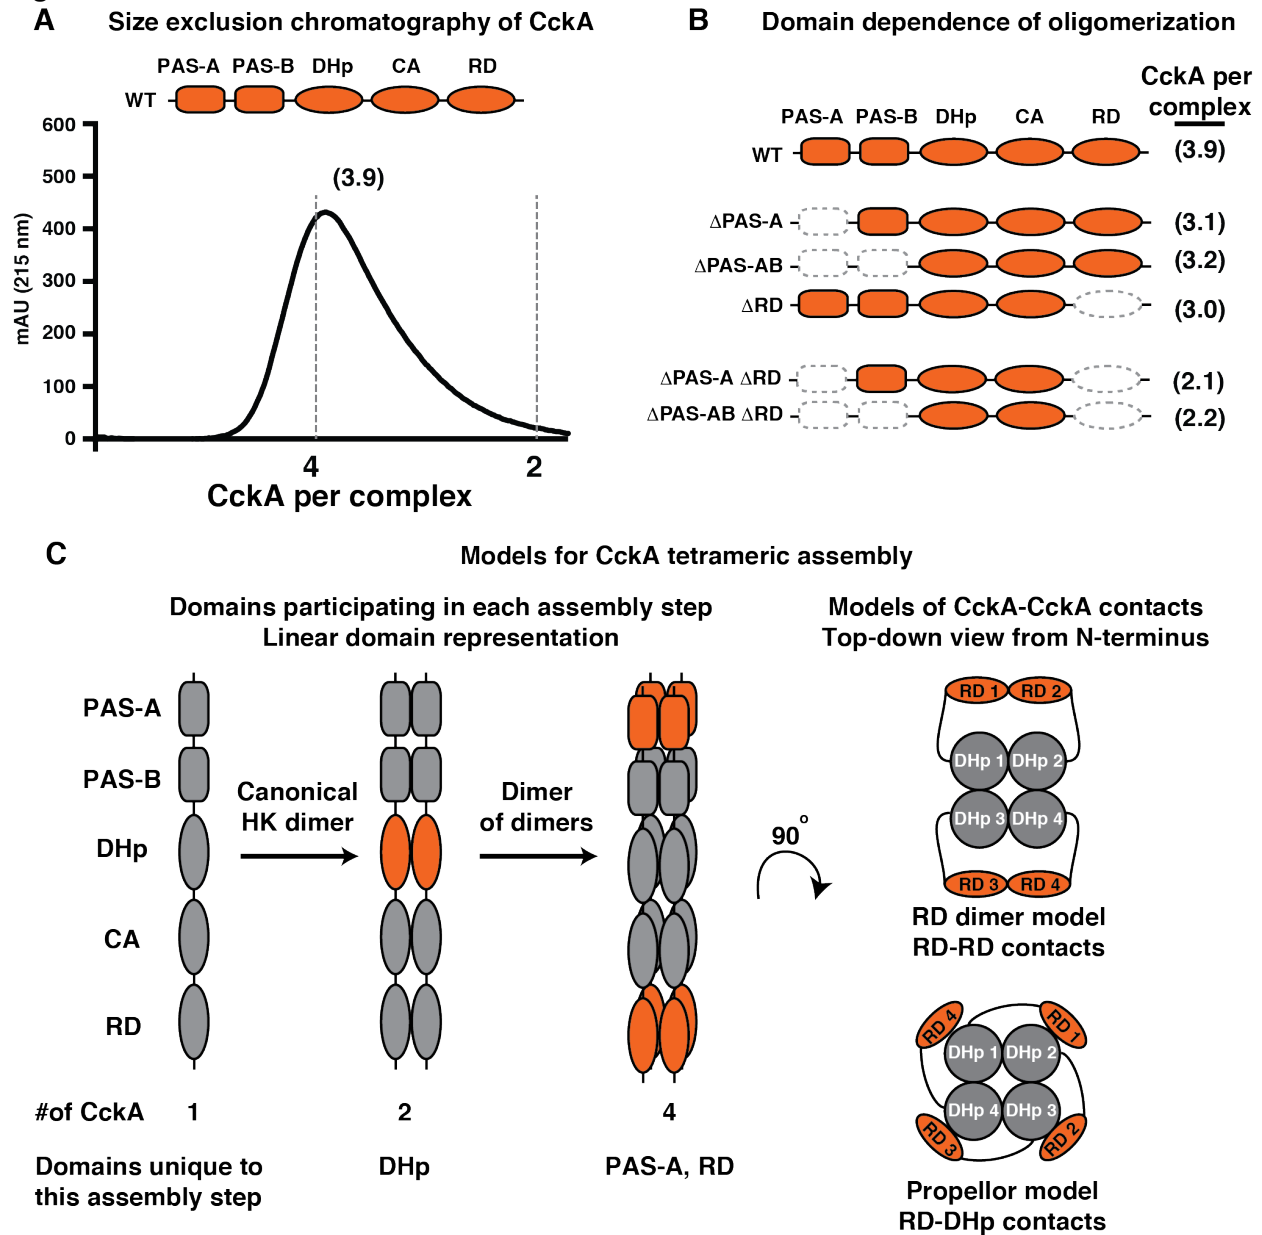

647  
 648  
 649  
 650  
 651  
 652  
 653  
 654  
 655  
 656  
 657  
 658

659 Figure 5  
660

Subcellular regulation of CckA catalysis

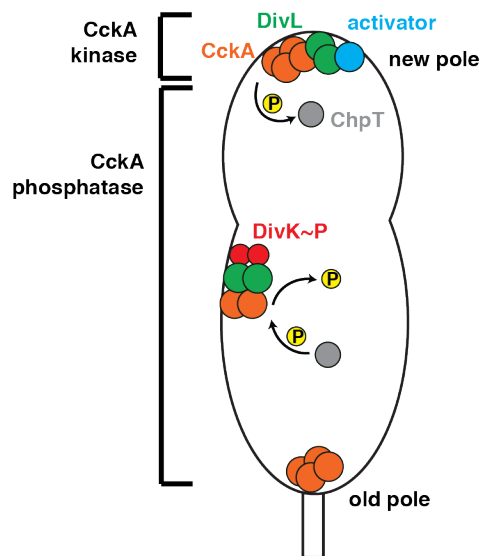

661
